# Supplementary material for: A Horizontally Transferred Autonomous Helitron Became a Full Polydnavirus Segment in Cotesia vestalis
Source: PubMed Central journal article supplement (PMC5714489; doi:10.1534/g3.117.300280), 2017-10-17
Supplement: 3925FileS1.pdf [file 3925FileS1.pdf]

**File S1.** Nucleotide sequence used as a query for searches on arthropod genomes. (A) Nucleotide sequence used as a query for Blastn searches on arthropod genomes. Sequence coding catalytic core from the Rep domain highlighted in green, and region coding flanking amino acid sequences in grey. The flanking N-terminal region in grey includes the rest of the Rep domain and the C-terminal region includes part of the sequence coding intermediate amino acids between Rep and Hel domains. (B) Complete Rep/Hel amino acid sequence with colors corresponding to the same marked regions from the nucleotide sequence. Pif1 helicase domain marked in yellow.

**A**

TATTGTTTTGCCTTTAAATTTGCCTTTGAAATGGTTAATTATCAAATTTTTTAATTTCAAGGTGAAGAAACTACAAAGAAAGTTAGCTC  
AATGAATTATTACGCATATCGTTTTGATGATTCGTCAAAATGCTGACAACATTTTGTGCGGTTTCGTCGATTGTTTCAGCAGTATTG  
CGTTGACATGTATGTAAAAATAGAAACGGAACGTTTAAACATTCATTAGGTTGAACCAAGCCAAACTGCGTTCTGAGGAGTACATCCA  
TTTACGTGATGCAGTTAATACTGAAGGAAATGCAGCTAATATTGGTTCGATTAACATTTCTGCCGGCGACATACATTGGTAGTCCACG  
TCATATGCATGAATATGCACAAGATGCAATGACATATGTTTCGTCATTACGGTTCGGCCCGATCTCTTTATTACTTTTACCTGTAATCC  
AAAATGGATAGAAATTAATCAATTGCTGCTTCCCGGACAAACATCAAGTGATAGACACGACATCACAGCAGTATATTACAGGCAAAA  
AATTCGGTCCCTGATGAACCTTTATTGTTAAACAACGCGTCTTTGGAGATACTCGATGCTGGATGTATTCAATCGAATGGCAAAGCG  
AGGCCTGC CGCACGCACACATTCTTATTTGGTTAGTGGAAAGAATTCAGCCTGACCAAATAGATGATATCATATGTGCTGAGATTCC  
TGATTATGAAGTCGATCCAGACCTACATGATGTTGTTACTACTAATATGATTCATGGACCGTGTGGTGCCATCAATCCCAATCACC  
TTGCATGGTTCGATGGAAAGTGTCTAAACGATATCCACGGAAATTAACGGCGGAGACTGTCACTGGCAATGATGGTTATCCGCTGTA  
TCGGCGTCGATCACCAGATGACAACGGTTCGAACTGTCAACAACGAAAGTAAAAAGAATGGATTTCGTTGTCGACAACAGTTGGATTGT  
TCCATATTCGCCACTTATTTCTAAATCGTTCAAGACACATTGCAACGTTGAATACTGCAATTCAGTTAAGTCCATAAAAATATATTTG  
CAAATATGTCACGAAAGGCAGTGA TATGGCGGTTTTTGGATTGCAATCCTCGAATACCAACGATGAAATTTACGCTATCAAGTTGG  
TCGTTATGTGAACTGTAATGAAGCGATTTGGCGTATATTCGATTTCCATTACGAAACGTCATCTACTGTTACGCATTTGGCGGT  
GCATCTGGAGAATGGTCAACGAGTATATTTACGGCTTCGAATGCTACGCAACGTGCTGAAACACCTCCAGCAACTACATTGACCAG  
TTTTTTTGAATCTGCCAAAGCGATCAGTTTGACGAACTTTGCTTTACTCGGAGATGCCACGTTATTATACTTGGAAATGCTTCATC  
GAAGAATTTTCAAAGACGGAAGCAAGGCGATGCGGTTCTGGGTATCCAGATGTGCGTTCCTACTGATGCTCTTGGTTCGATGTATAC  
AGTTCATCCAAAGAATAATGAATGTTTCTATTTGCGGTTGTTGCTGGTAAATGTGCGTGGGCCAACGTCATTTGAGTCACTACGAAC  
TGTTAATGGTGTAAATATCCCAACATATCGTGCTGCATGTGAAGAATTGAAGTTATTAGAAAACGATAGTCATTGGGATACGACAA  
CGCTGAAGCCATTATCTGTGCA

**B**

MQNRRANNRGQQIDNLRRRTRYLSSADLNRAAFQYDCSNDYSLHPSVCIGQMDVVCEYCGALKFSGETPGLCCLNGKVKLPLLTPPP  
EPLYSLLCGETQESRHLANTQKYNCFQMTSFGADIIIEERGFNPTFKIQGQIHHRIGSLLPFEDTQNKFLQIYFMGNMEEQLDRRL  
EINAGMKRAILQDLQCLLHEHHLVRLFKSALERMPSDDYKVVIKADKRPSGTHEFTFNAPTVDVAIILVGEQLEKRDIVLRRD  
GQLQQISETHRSYDTLQYPLMFQGEDGYFNIKMKNPLN GEETTKKVSSMNYAYRLMIRQNADNYLLRFRRLFQQYCVDMYVKIE  
TERLTFIRLNQAKLRSEEYIHLRDAVNTEGNAANIGRLTILPATYIGSPRHMHEYAQDAMTYVRHYGRPDLFITFTCNPKWIEITQL  
LLPGQTSDDRHDITARIFRQKIRSLMNFIVKQRFVGDTRCWMYSIEWQKRGLP HAHIL IWLVERIQPDQIDDI CAEIPDYEVDPDL  
HDVVTNMIHGPGAINPQSPCMVDGKCSKRYPRKLAETVTGNDGYPLRRRSPDDNGRTVTKVKRMDVFVDNSWIVPYSPLISK  
SFKTHCNVEYCNVKS IKYICKYVTKGSDM AVFGLQSSNTNDEISRQVGRYVNCNEAIWRIFAFPIHERHPTVTHLAVHLENGQRV  
YFTASNATQRAETPPATTLTSFFAICQSDQFARTLLYSEMPRYTWNASSKNFQRRKQGDVPGYPDVRSTDALGRMYTVHPKNNEC  
FYLRLLLVNVRGPTSFESLRTVNGVIFPTYRAACEELKLENDSHWDTTIAEAIICA SPSQIRTLFAIIISTCFPSNPCNLWHKYKD  
NMSDILHQIRVSSRNHDIEMNEEIHNRALLIEDMCYLMCGNLLIRLGMPAPYREMNDAFNRELEREREYDHQELDLVVQTNVPLL  
NYQQKKVYDTLMKAIDDENGLY FLDAPGGTGKTFMLSLVLATVVRARSNI AVAVASSGIAATLLEGCPMAKVLAVSKII IWDECTMA  
HKRALEALNRTLKDLRNDSRCFGGAMILLSGDFRQILPVI PRSTAADEINACLKSSNLWRHVKKLQLTTNMRVALLNDTSAEDFSEQ  
LLTIGNGQVPVDESSGLISFPNNFCNFVSSKDELINNVFPEIISNYKNEYWMSERAI LAANKNDVDDLNNIIQNKIIGTMHSFKSID  
CVTNEDEATNYPIEFLNSLDVPGPLPHNLRLKVGSSVIMLRNINQPKLCNGTRLVVRKLMNNVIYATIMIGKFKGEQVLI PRI PMIP  
TDMPEFEKRLQFP IRLAFAMTINKSQGQSLKVCGLNLEHSCFSHGQLYVACSRVGRPSALFV FAPDNKTKNVVYHKVLK
